# Supplementary material
Source: publisher figshare collection journal article supplement (https://diabetesjournals.figshare.com/ndownloader/files/25281608)

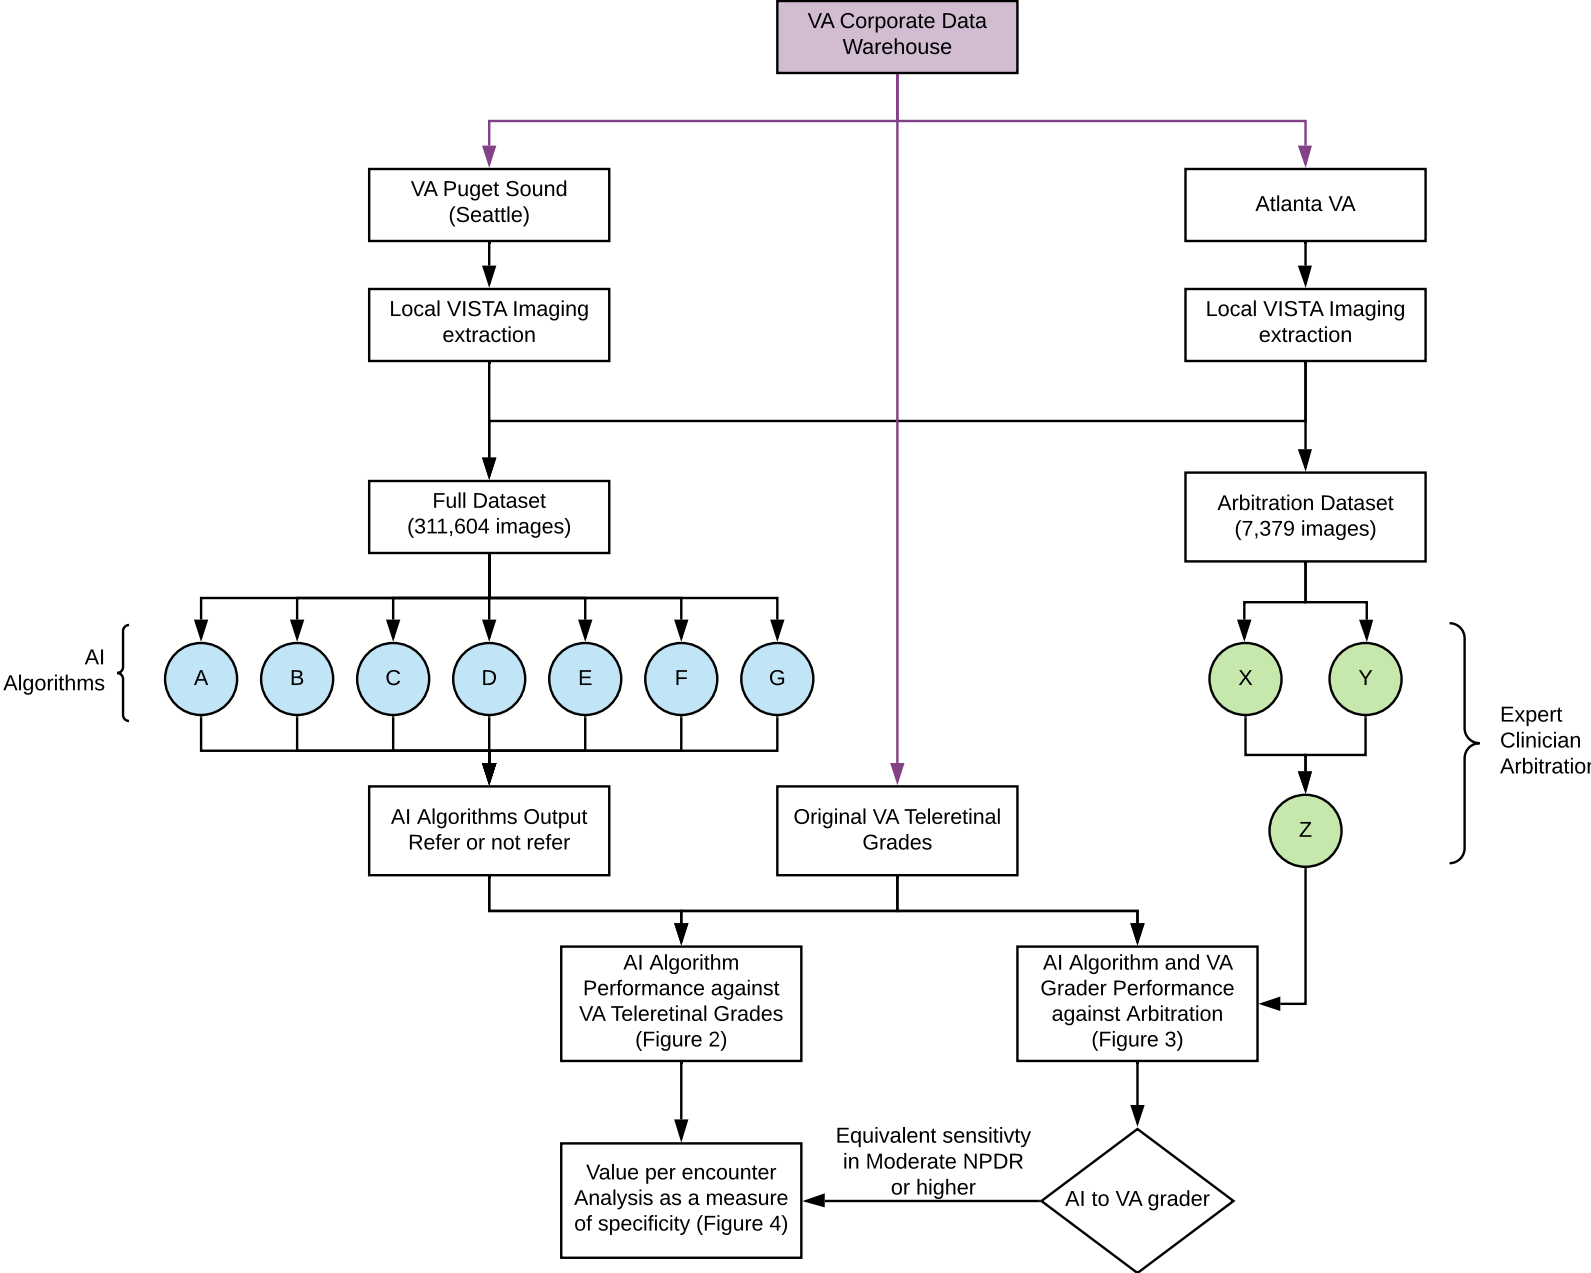

Supplement: Supplementary file 1 [file 25281608]
